# Supplementary material for: Synthesis of Photochromic Oligophenylenimines: Optical and Computational Studies
Source: MDPI journal article supplement (doi:10.3390/molecules20045440), 2015-03-27

# Supplementary File

## Fragment Patron OIC1C and OIC1MS

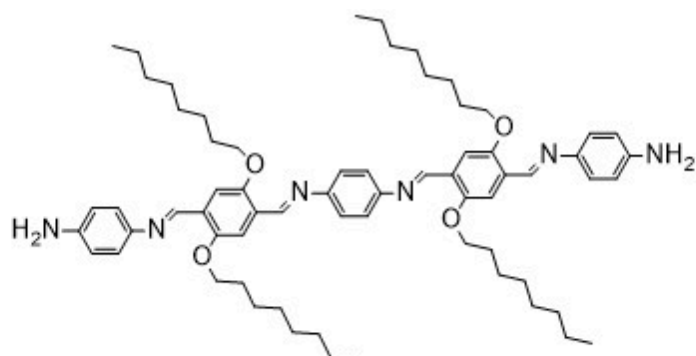

m/z: 1032.72 (100.0%), 1033.72 (74.8%), 1034.72 (27.5%), 1035.73 (6.7%), 1036.73 (1.4%)

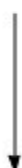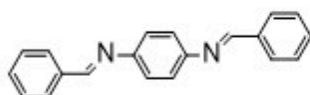

m/z: 284.13 (100.0%), 285.13 (22.4%), 286.14 (2.3%)

m/z: [ M-748 ]

Fragment patron OIC1C and OIC1MS

## Fragment Patron OIC2C and OIC2MS

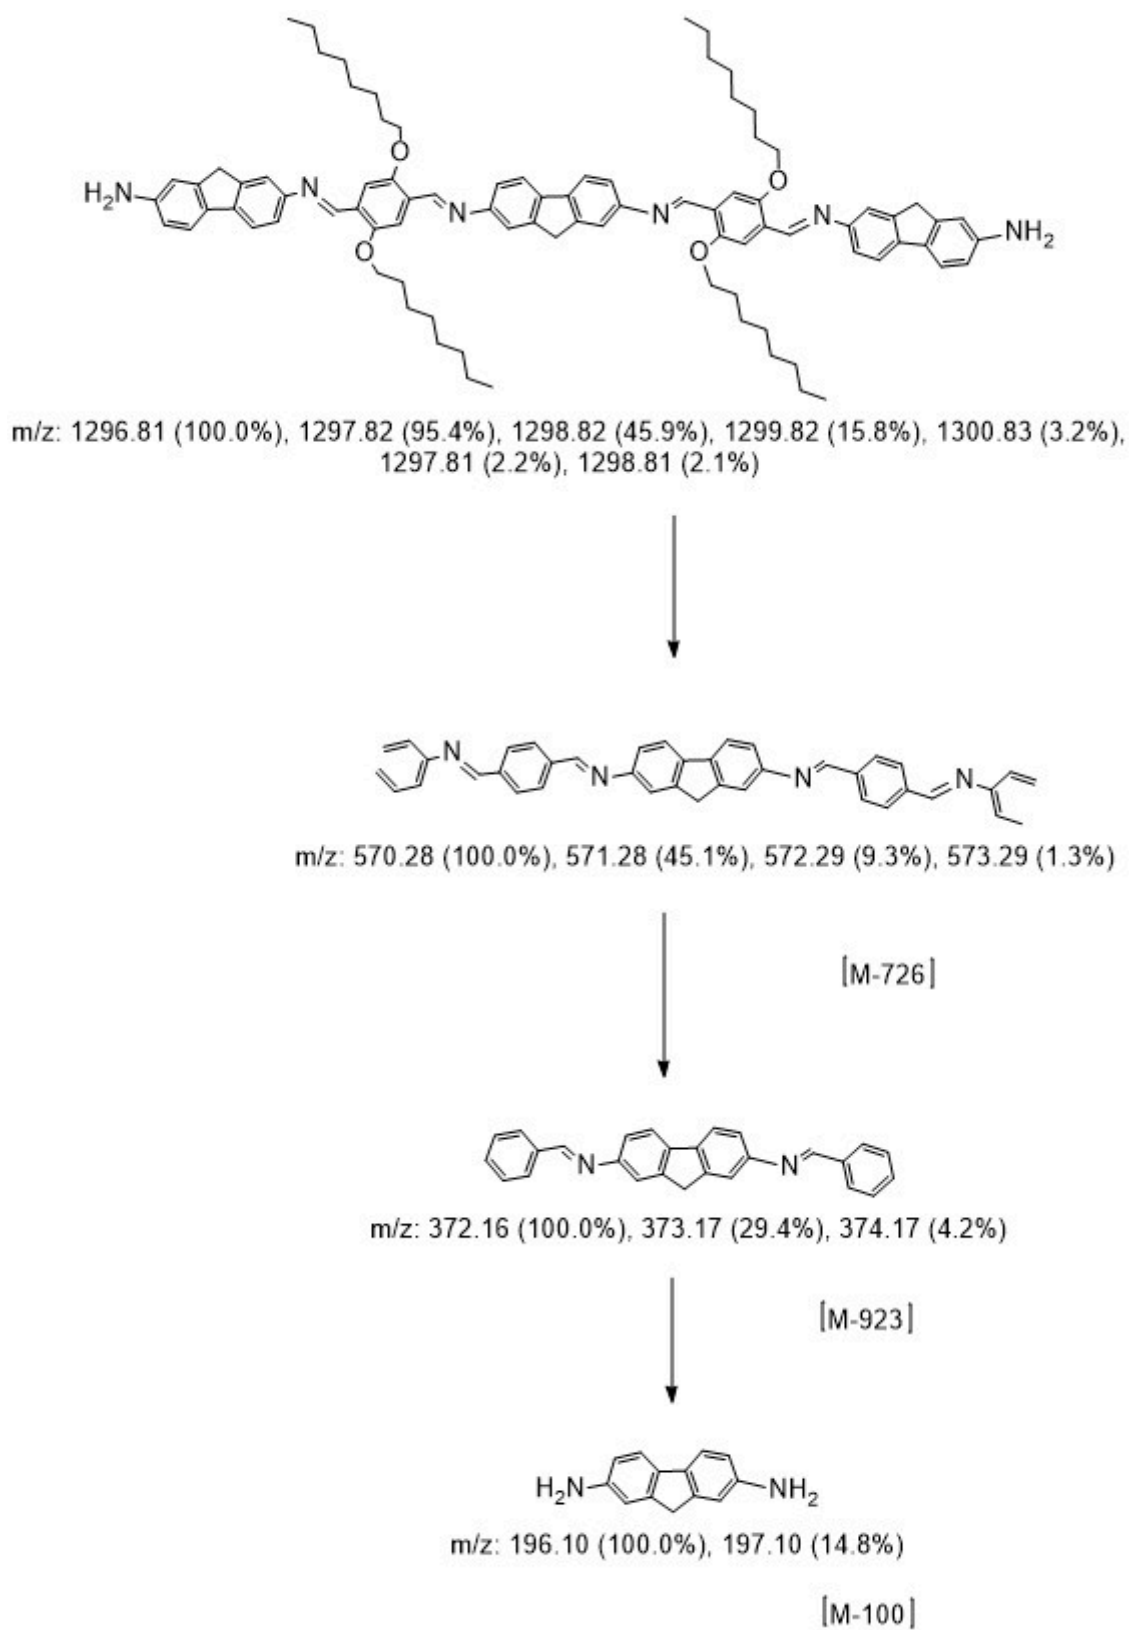

## Qualitative Analysis Report of OIC1C

## Qualitative Analysis Report

|                        |                              |                               |         |
|------------------------|------------------------------|-------------------------------|---------|
| <b>Data Filename</b>   | OT292_ID_1_CHCL3.d           | <b>Sample Name</b>            | OIC1C   |
| <b>Sample Type</b>     | Sample                       | <b>Position</b>               | P1-F4   |
| <b>Instrument Name</b> | Instrument 1                 | <b>User Name</b>              |         |
| <b>Acq Method</b>      | ESI_POS_SCAN_100AC<br>N-ID.m | <b>IRM Calibration Status</b> | Success |
| <b>DA Method</b>       | ESI-NEG_FLAV_MGV.m           | <b>Comment</b>                |         |

## User Chromatograms

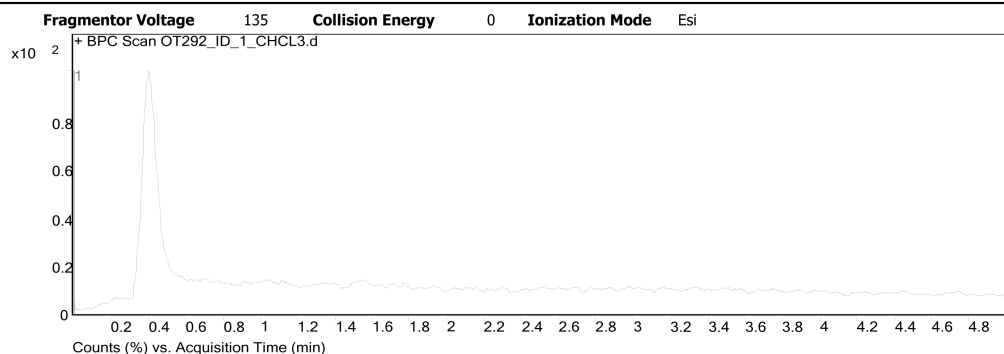

## User Spectra

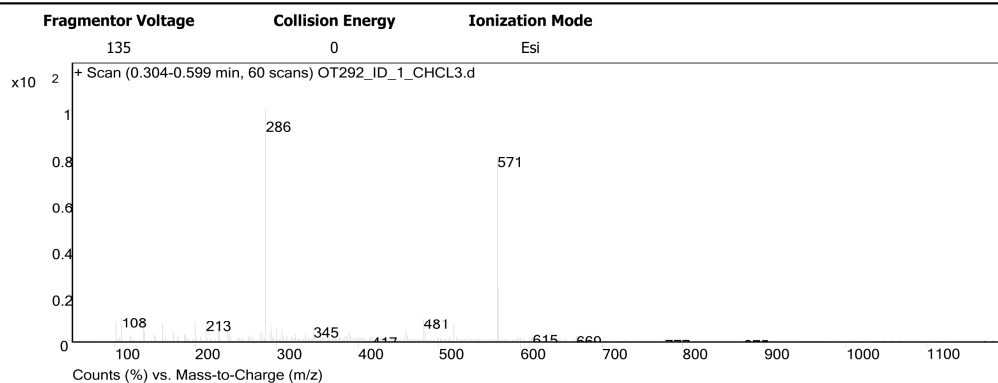

## Peak List

| m/z | z | Abund. |
|-----|---|--------|
| 102 |   | 22194  |
| 108 |   | 28342  |
| 109 |   | 26047  |
| 135 | 2 | 21836  |
| 213 |   | 24040  |
| 286 |   | 272724 |
| 481 |   | 26897  |
| 571 |   | 218979 |
| 572 | 1 | 25956  |
| 572 | 1 | 62412  |

## OIC1MS-1H-NMR

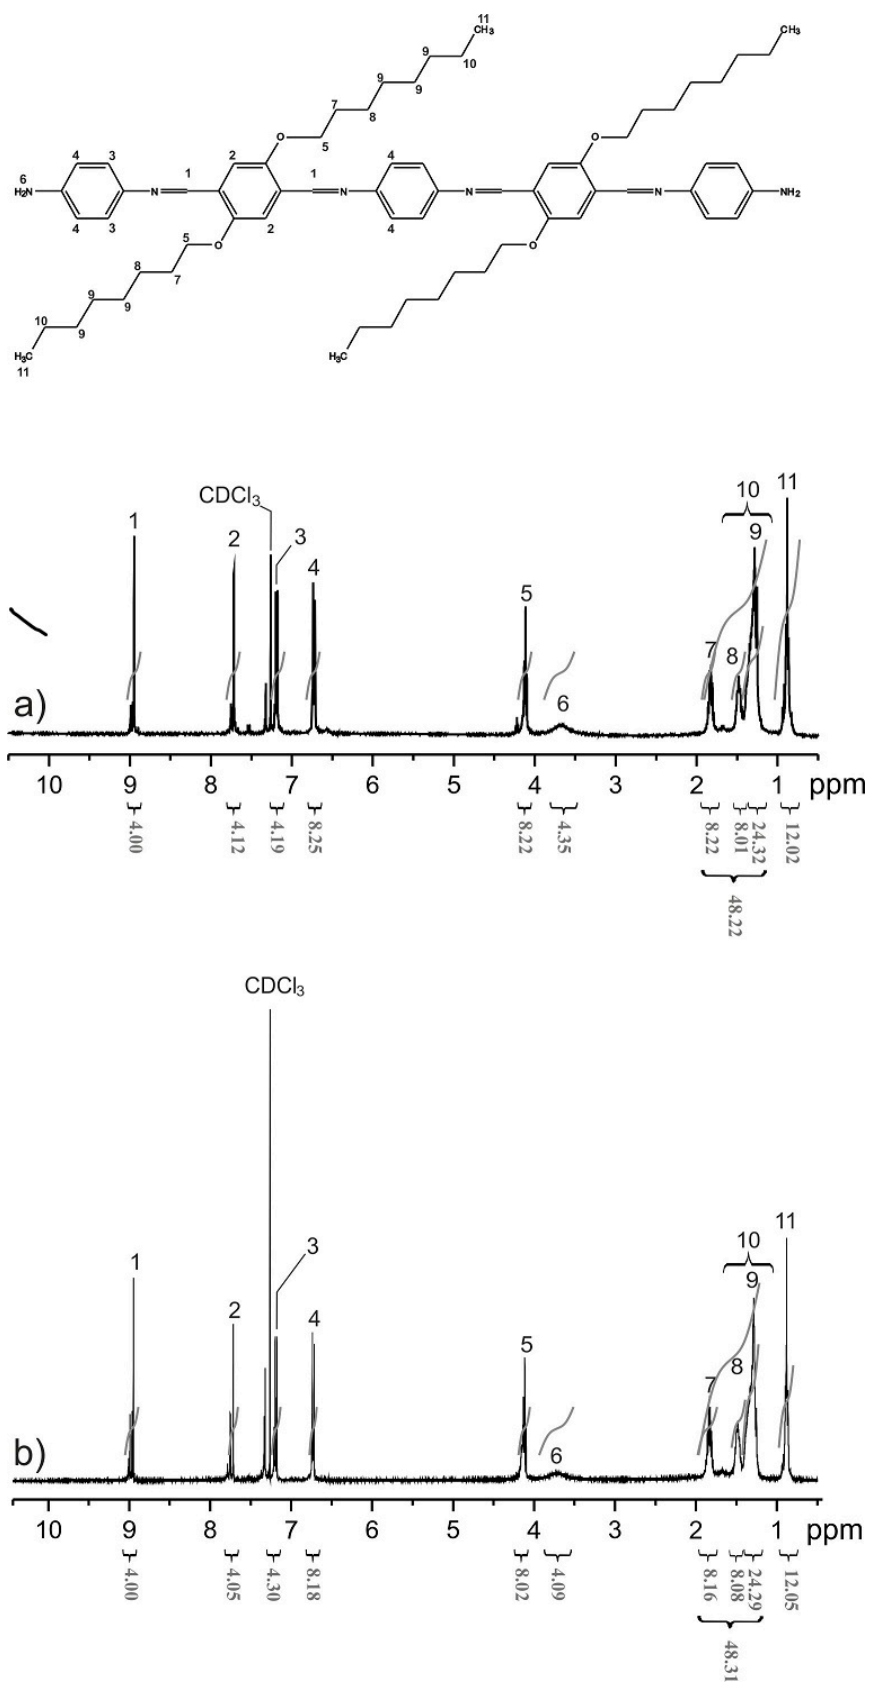

## Qualitative Analysis Report of OIC1MS

## Qualitative Analysis Report

|                        |                              |                               |         |
|------------------------|------------------------------|-------------------------------|---------|
| <b>Data Filename</b>   | OT290_ID_CHCL3_1.d           | <b>Sample Name</b>            | OIC1MS  |
| <b>Sample Type</b>     | Sample                       | <b>Position</b>               | P1-F2   |
| <b>Instrument Name</b> | Instrument 1                 | <b>User Name</b>              |         |
| <b>Acq Method</b>      | ESI_POS_SCAN_100AC<br>N-ID.m | <b>IRM Calibration Status</b> | Success |
| <b>DA Method</b>       | ESI-NEG_FLAV_MGV.m           | <b>Comment</b>                |         |

## User Chromatograms

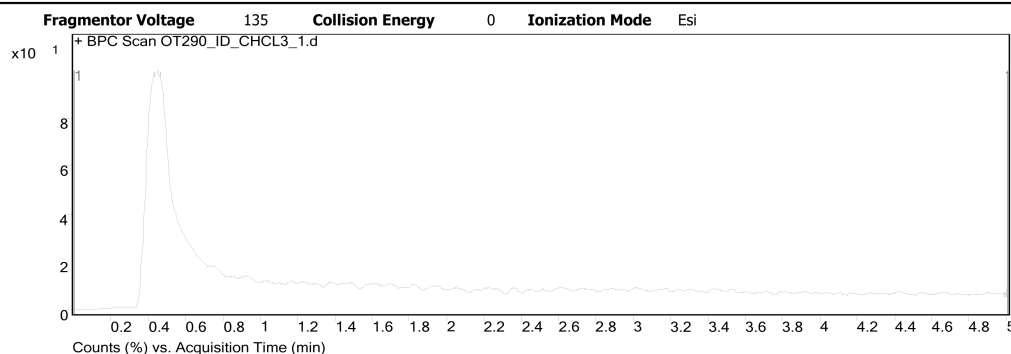

## User Spectra

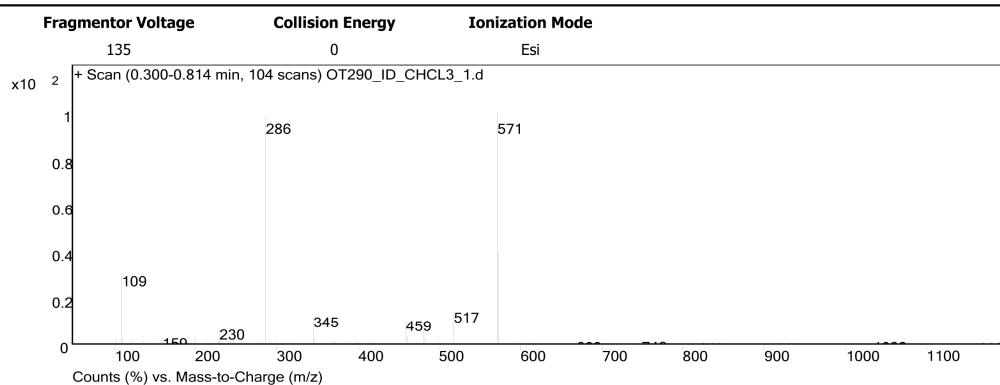

## Peak List

| m/z | z | Abund. |
|-----|---|--------|
| 108 |   | 105085 |
| 109 | 1 | 268831 |
| 230 |   | 52775  |
| 286 |   | 895358 |
| 345 |   | 104480 |
| 459 | 1 | 89500  |
| 517 |   | 125566 |
| 571 |   | 915530 |
| 572 | 1 | 363141 |
| 573 | 1 | 68925  |

## Qualitative Analysis Report of OIC2C

## Qualitative Analysis Report

|                        |                              |                               |         |
|------------------------|------------------------------|-------------------------------|---------|
| <b>Data Filename</b>   | OT294_ID_CHCL3_1.d           | <b>Sample Name</b>            | OIC2C   |
| <b>Sample Type</b>     | Sample                       | <b>Position</b>               | P1-F6   |
| <b>Instrument Name</b> | Instrument 1                 | <b>User Name</b>              |         |
| <b>Acq Method</b>      | ESI_POS_SCAN_100AC<br>N-ID.m | <b>IRM Calibration Status</b> | Success |
| <b>DA Method</b>       | ESI-NEG_FLAV_MGV.m           | <b>Comment</b>                |         |

## User Chromatograms

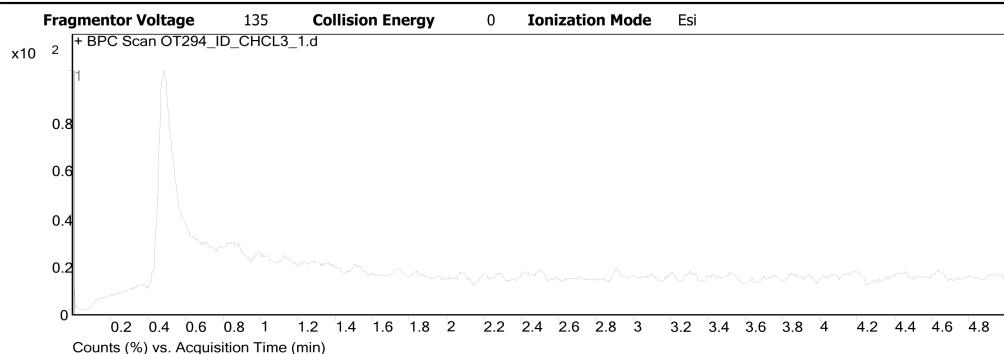

## User Spectra

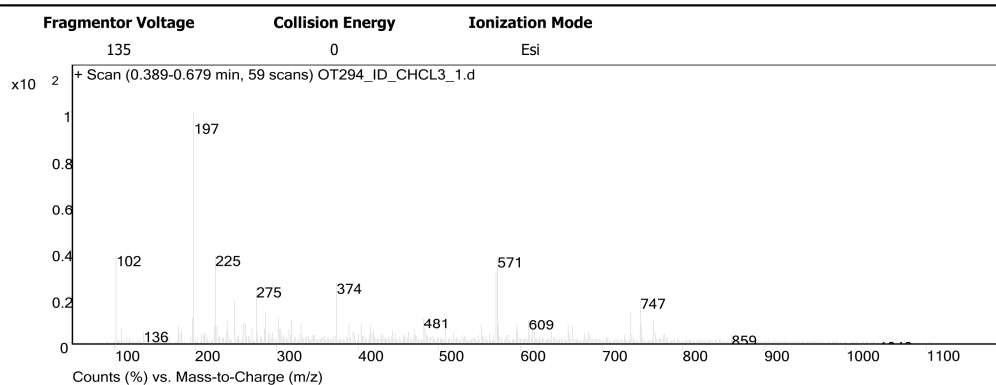

## Peak List

| m/z | z | Abund. |
|-----|---|--------|
| 102 |   | 35402  |
| 197 | 1 | 93105  |
| 225 | 1 | 35414  |
| 247 |   | 16949  |
| 275 | 1 | 22885  |
| 374 |   | 24116  |
| 569 |   | 28743  |
| 571 |   | 19448  |
| 571 | 1 | 34728  |
| 747 |   | 18376  |

## Qualitative Analysis Report of OIC2MS

## Qualitative Analysis Report

|                        |                              |                               |         |
|------------------------|------------------------------|-------------------------------|---------|
| <b>Data Filename</b>   | OT293_ID_1_CHCL3.d           | <b>Sample Name</b>            | OIC2MS  |
| <b>Sample Type</b>     | Sample                       | <b>Position</b>               | P1-F5   |
| <b>Instrument Name</b> | Instrument 1                 | <b>User Name</b>              |         |
| <b>Acq Method</b>      | ESI_POS_SCAN_100AC<br>N-ID.m | <b>IRM Calibration Status</b> | Success |
| <b>DA Method</b>       | ESI-NEG_FLAV_MGV.m           | <b>Comment</b>                |         |

## User Chromatograms

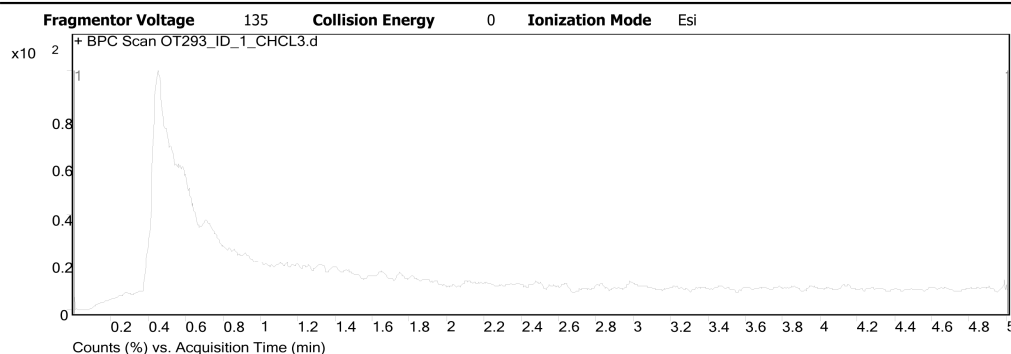

## User Spectra

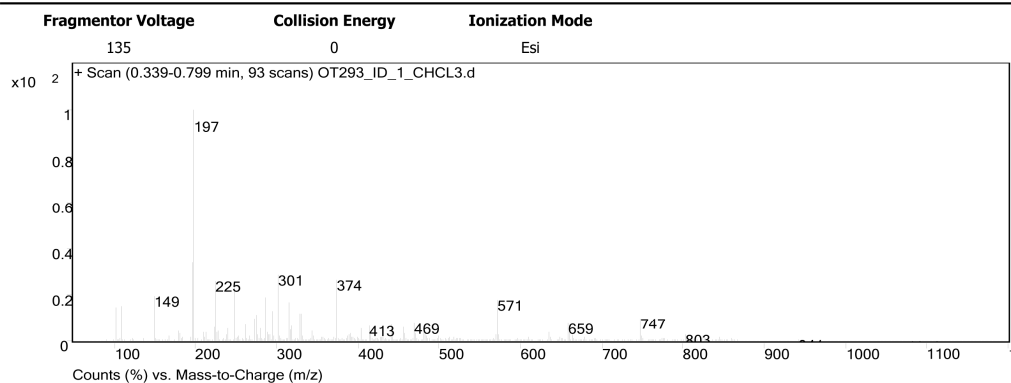

## Peak List

| m/z | z | Abund. |
|-----|---|--------|
| 149 |   | 29365  |
| 196 |   | 51949  |
| 197 | 2 | 152117 |
| 225 | 2 | 39366  |
| 247 | 1 | 36498  |
| 287 |   | 29097  |
| 301 | 1 | 43953  |
| 315 | 1 | 25483  |
| 374 |   | 40382  |
| 571 |   | 27394  |

## OIC2MS-1H-NMR

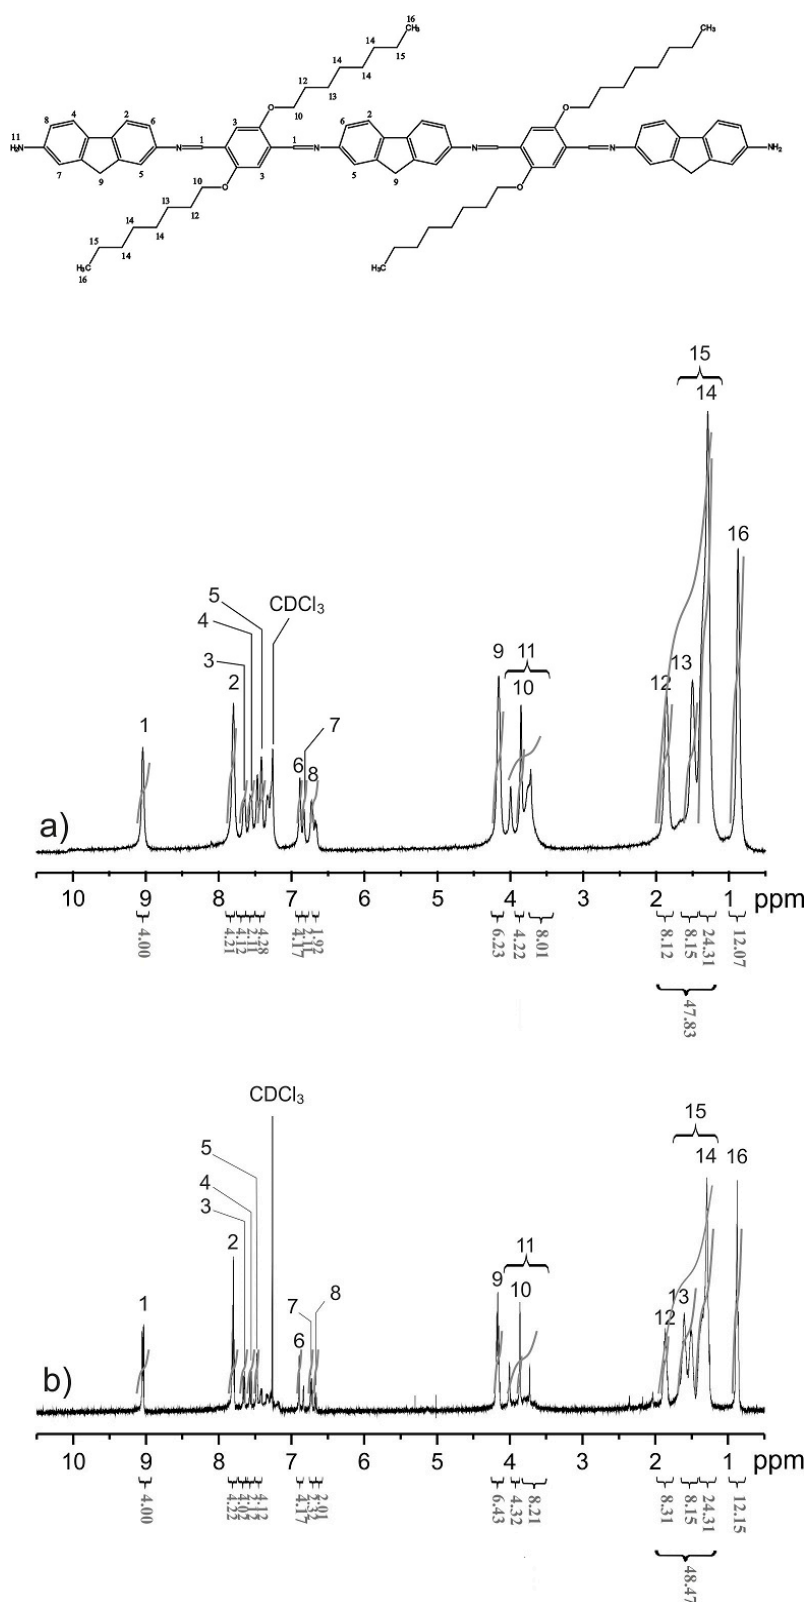

Supplement: s1 [file s1]
